# Supplementary material
Source: PubMed Central journal article supplement (PMC5431580)

placebo

*L. reuteri*

Placebo Subject 1

Placebo Subject 2

Placebo Subject 3

*L. reuteri* Subject 4

*L. reuteri* Subject 5

*L. reuteri* Subject 6

D00  
Pre

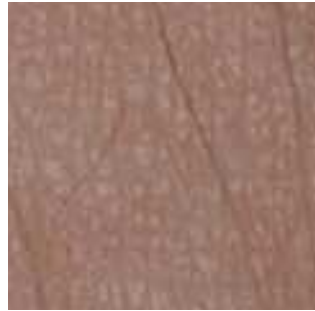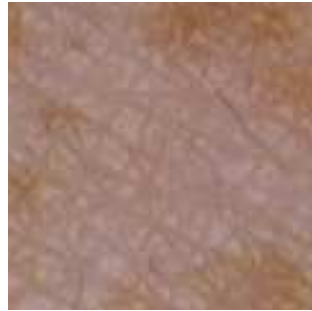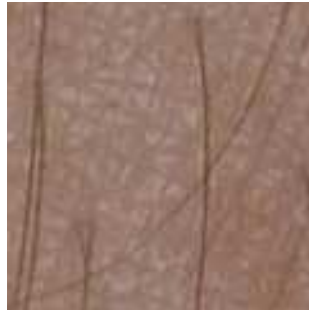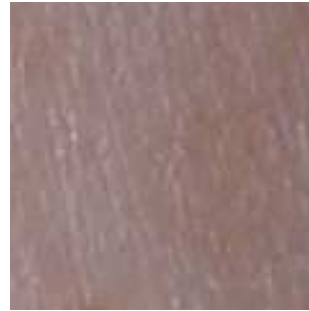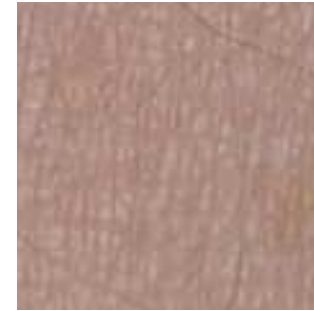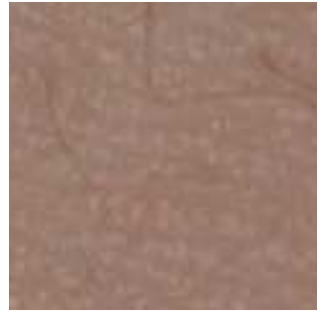

D00  
Post

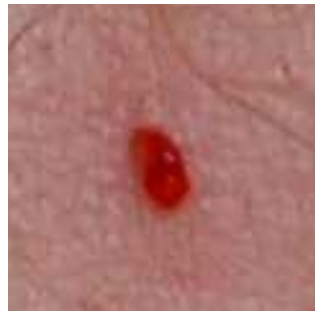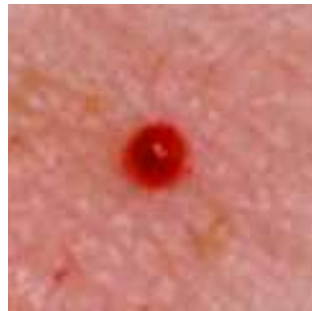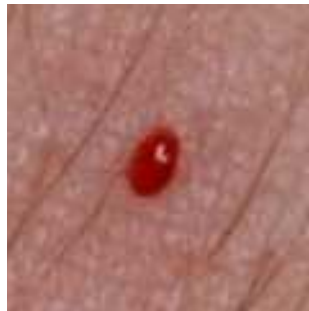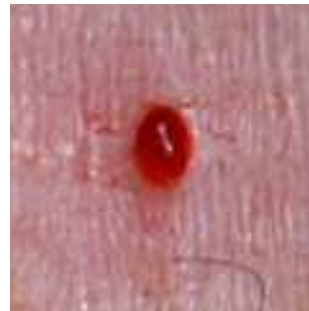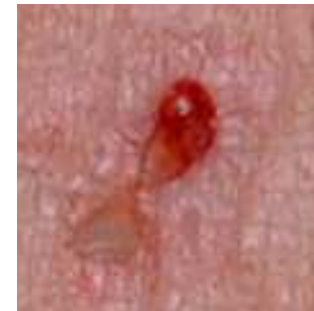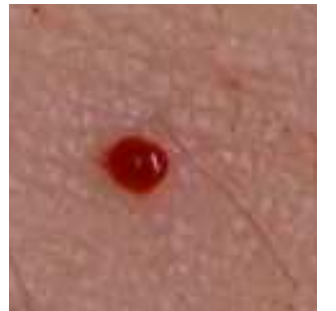

D03

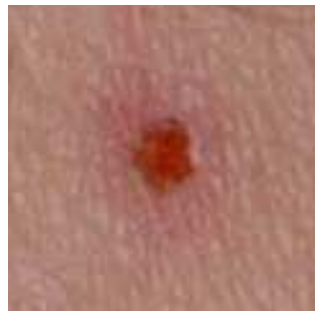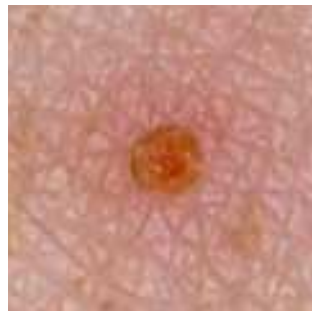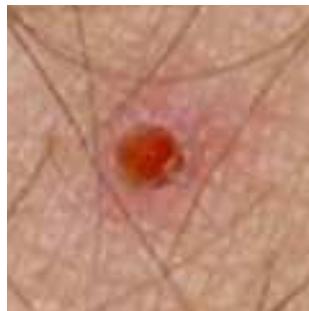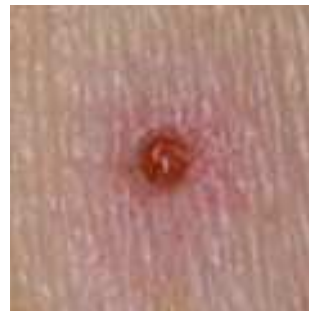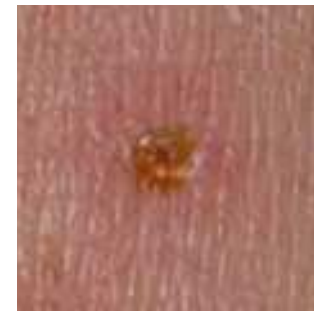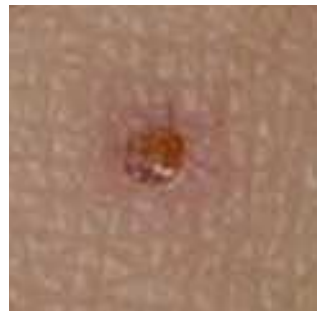

Supplement: NIHMS855781-supplement-S2.pdf [file NIHMS855781-supplement-S2.pdf]
