# Supplementary material
Source: PubMed Central journal article supplement (PMC5431580)

———— untreated ————

———— *L. reuteri* ————

D00  
Pre

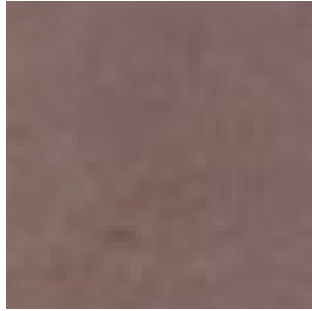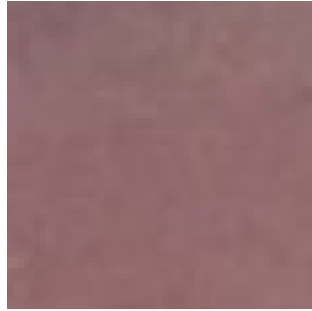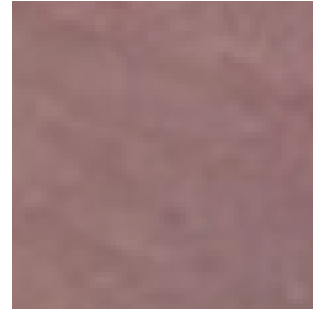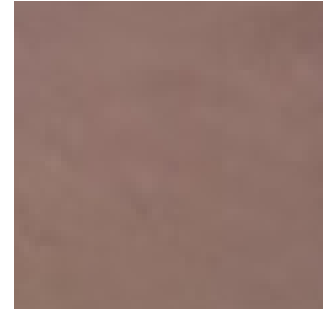

D00  
Post

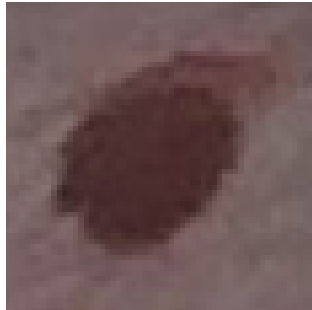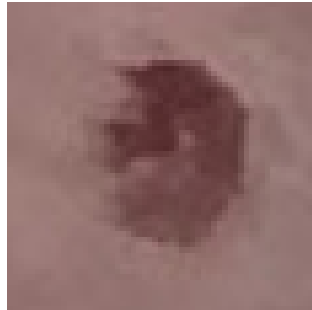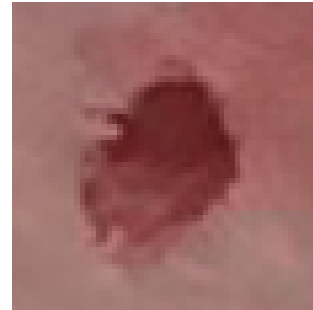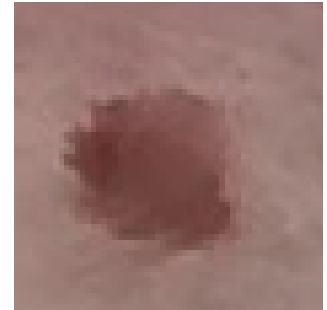

D03

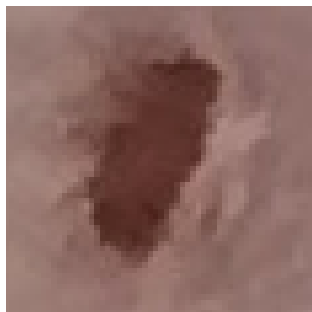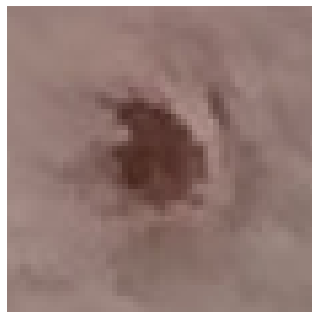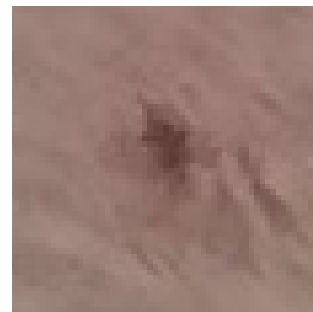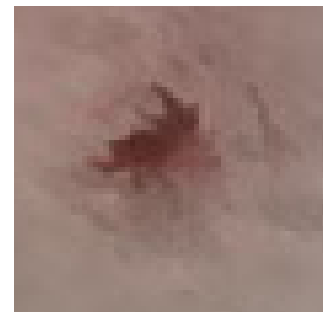

Supplement: NIHMS855781-supplement-S1.pdf [file NIHMS855781-supplement-S1.pdf]

**A. Supplemental Figure 3.**

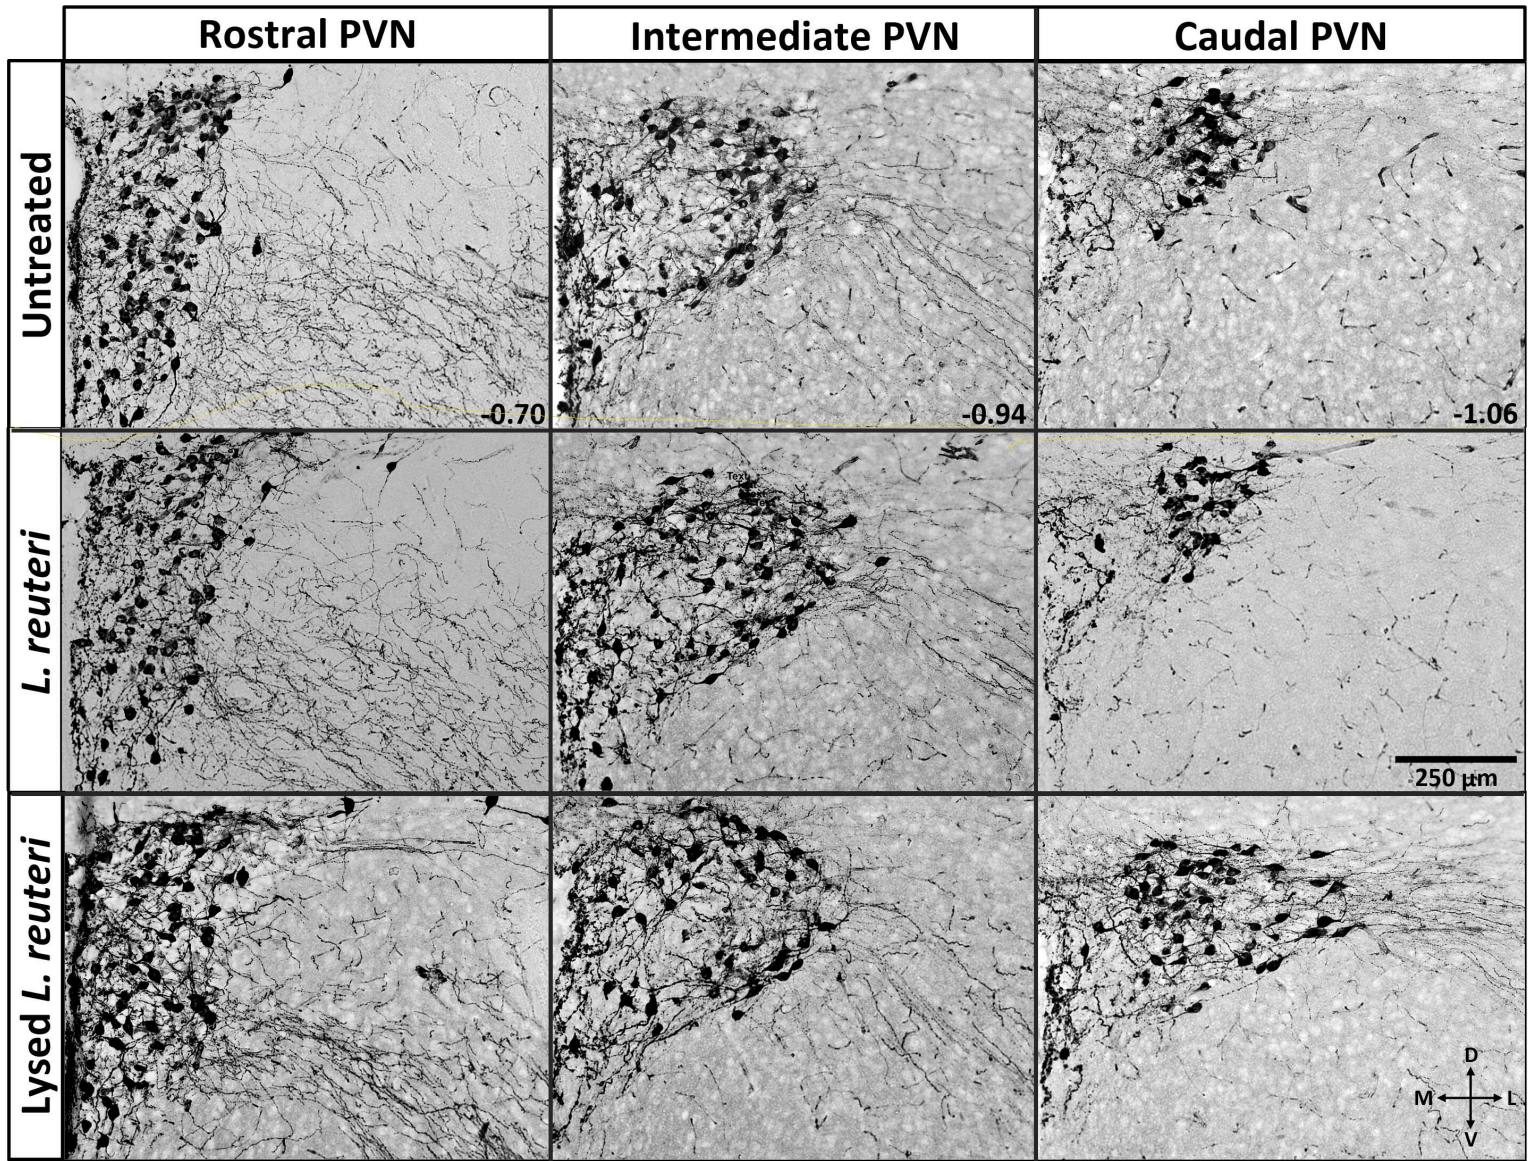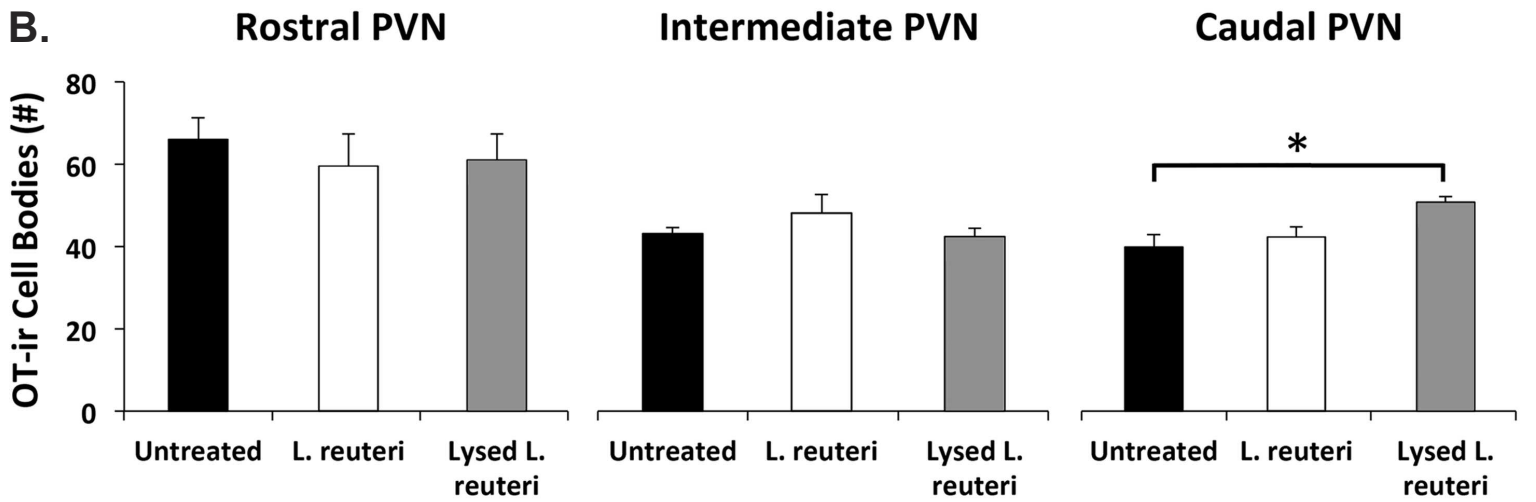

Supplement: NIHMS855781-supplement-S3.pdf [file NIHMS855781-supplement-S3.pdf]
